# Supplementary material
Source: PubMed Central journal article supplement (PMC8756381)
Supplement: NIHMS1762500-supplement-1.pdf [file NIHMS1762500-supplement-1.pdf]

## SUPPLEMENTAL FIGURE 1

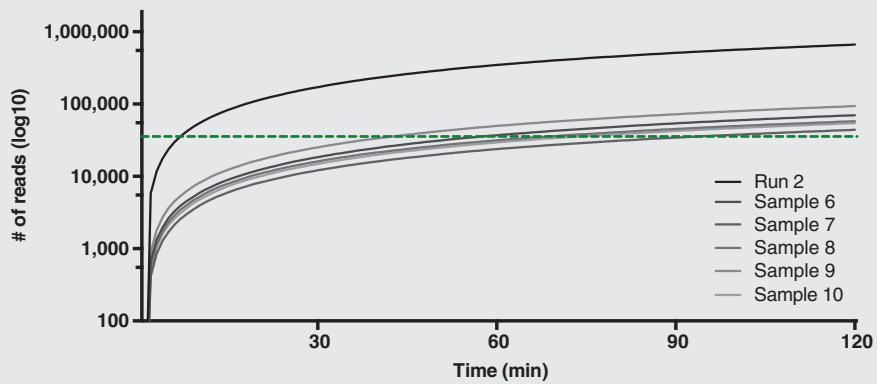

MinION nanopore sequencing representative yield performance (grayscale, sample 1-5; black, run 2 accumulative; green dotted-line, threshold for  $\geq 30K$  uniquely aligned reads for downstream analysis).

Wei. Rapid PGS using a handheld sequencer. Fertil Steril 2018.

**SUPPLEMENTAL FIGURE 2**

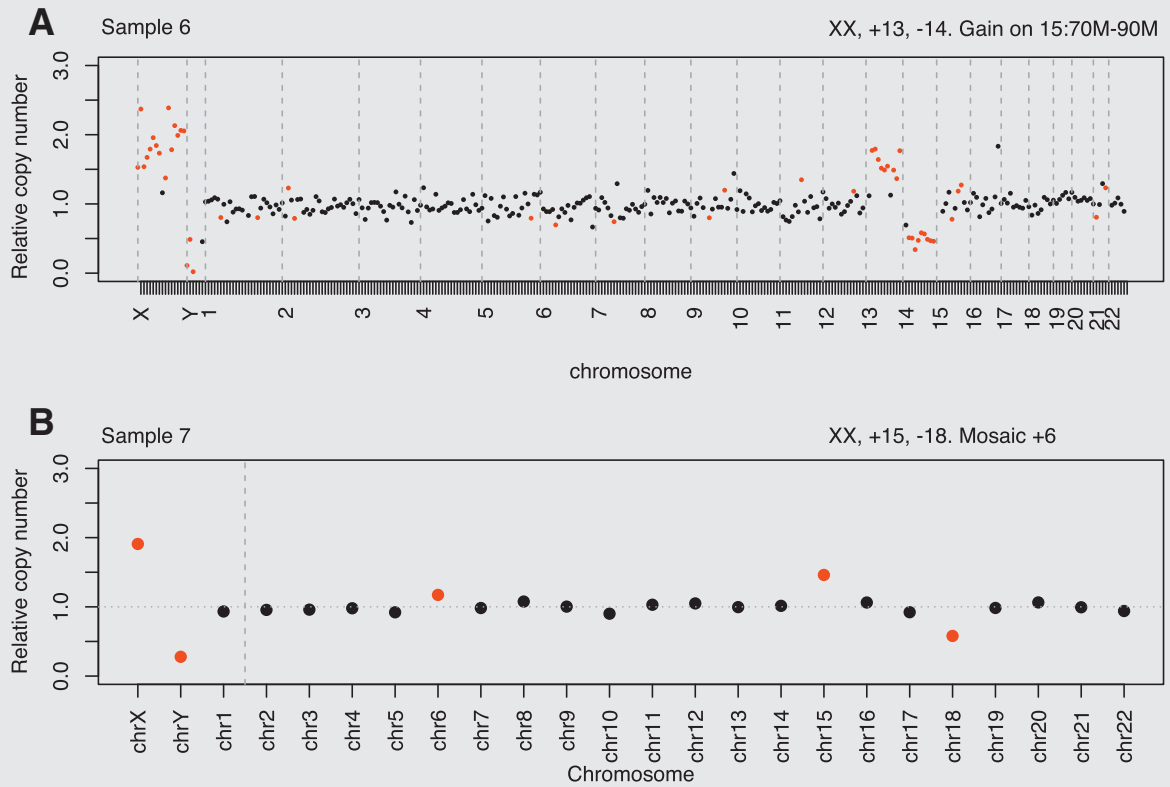

MinION large copy number variation and mosaic aneuploidy detection. **(A)** Large copy number variation detection using 10 Mbs bins. The abnormality of each chromosomal segment was indicated by color (*red*, abnormal; *black*, normal). **(B)** Mosaic aneuploidy detection. The abnormality of each chromosome was indicated by color (*red*, abnormal; *black*, normal).

*Wei. Rapid PGS using a handheld sequencer. Fertil Steril 2018.*
